# Supplementary material
Source: Springer Nature journal article supplement (https://www.springermedizin.de/resource/supplementary/12889_2012_5063_MOESM2_ESM.pdf/9494376)

# Subjective well-being

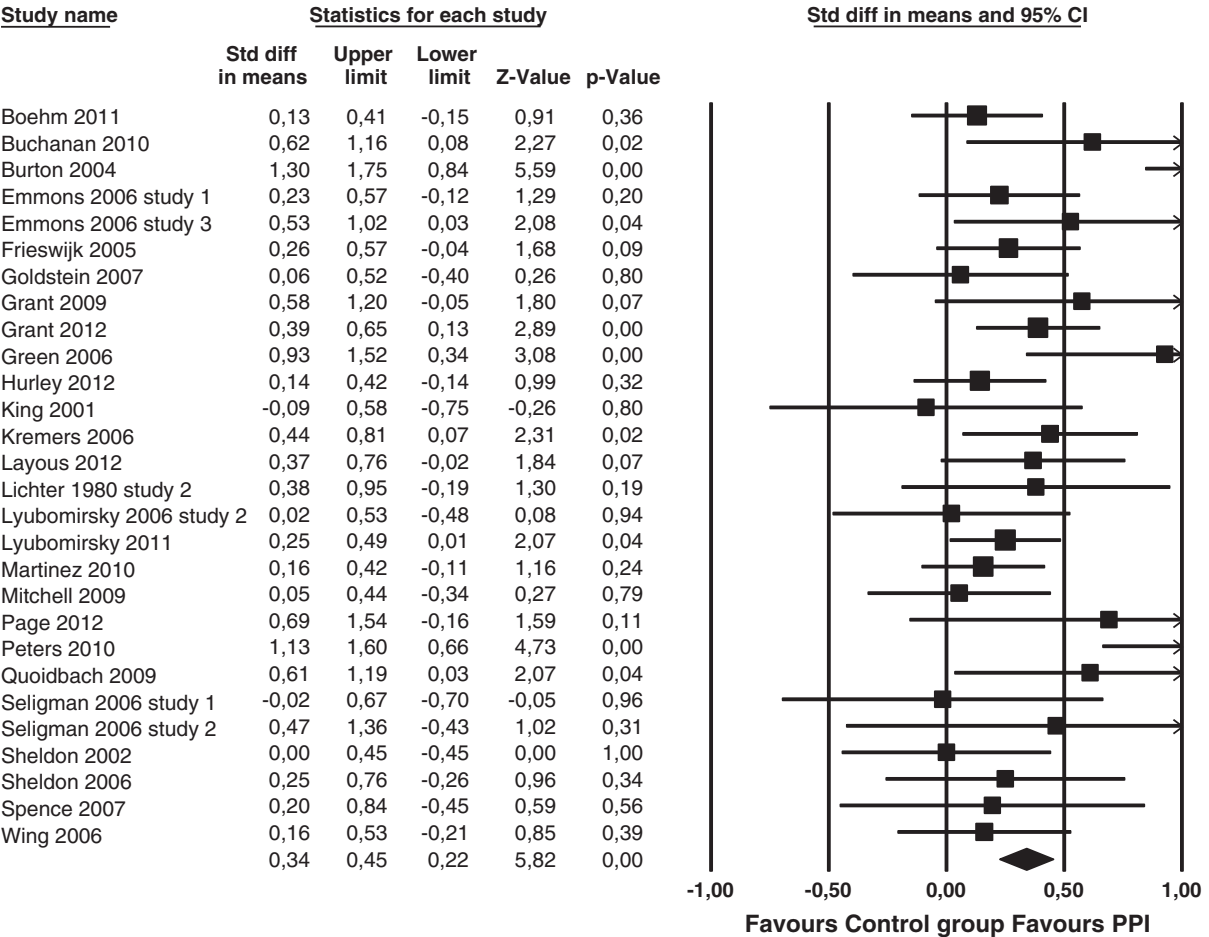

Supplement: MOESM2 [file 9494376]
